# Supplementary material for: A novel strategy for site selective spin-labeling to investigate bioactive entities by DNP and EPR spectroscopy
Source: Springer Nature journal article supplement (doi:10.1038/s41598-021-92975-6), 2021-07-01
Supplement: MOESM1 [file 41598_2021_92975_MOESM1_ESM.pdf]

# A Novel Strategy for Site Selective Spin-Labeling to Investigate Bioactive Entities by DNP and EPR Spectroscopy

Kevin Herr<sup>a+</sup>, Max Fleckenstein<sup>b+</sup>, Martin Brodrecht<sup>a</sup>, Mark V. Höfler<sup>a</sup>, Henrike Heise<sup>c,d</sup>, Fabien Aussenac<sup>e</sup>, Torsten Gutmann<sup>a</sup>, Michael Reggelin<sup>b\*</sup> and Gerd Buntkowsky<sup>a\*</sup>

<sup>a</sup> Institute of Physical Chemistry, Technical University Darmstadt, Alarich-Weiss-Straße 8, D-64287 Darmstadt, Germany

<sup>b</sup> Institute of Organic Chemistry, Technical University Darmstadt, Alarich-Weiss-Straße 4, D-64287 Darmstadt, Germany

<sup>c</sup> Institute of Complex Systems, Structural Biochemistry (ICS-6), Forschungszentrum Jülich, D-52425 Jülich, Germany.

<sup>d</sup> Institut für Physikalische Biologie, Heinrich-Heine-Universität Düsseldorf, D-40225 Düsseldorf, Germany

<sup>e</sup> Bruker France SAS, 34 rue de l'industrie, F-67160 Wissembourg, France

[+] These authors contributed equally to this work.

\* eMail: [gerd.buntkowsky@chemie.tu-darmstadt.de](mailto:gerd.buntkowsky@chemie.tu-darmstadt.de)  
[re@chemie.tu-darmstadt.de](mailto:re@chemie.tu-darmstadt.de)

## Contents

<sup>1</sup>H liquid NMR spectra

<sup>13</sup>C liquid NMR spectra

HPLC chromatograms

MS spectra

EPR spectra

1. Synthesis of bis-sulfone based spin label
  - 1.1 Bisthioether **7**
  - 1.2 Bis-sulfone **8**
  - 1.3 Bis-sulfone based spin label **4** and **5**
  
2. Synthesis of spin labeled eptifibatide
  - 2.1 Reduced eptifibatide **2**
  - 2.2 Spin labeled eptifibatide **3**

# 1 Synthesis of the bis-sulfone based spin label

## 1.1 Bisthioether 7

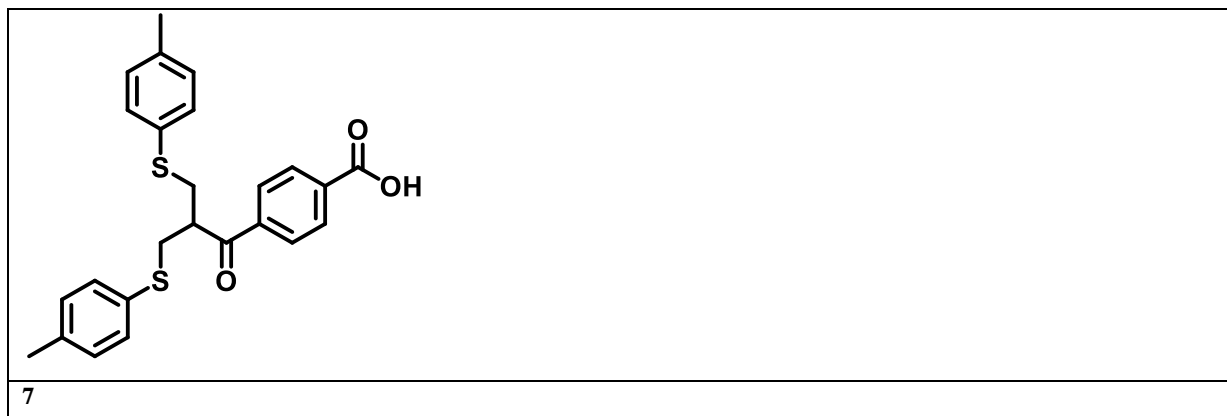

### 1.1.1 <sup>1</sup>H liquid NMR spectrum

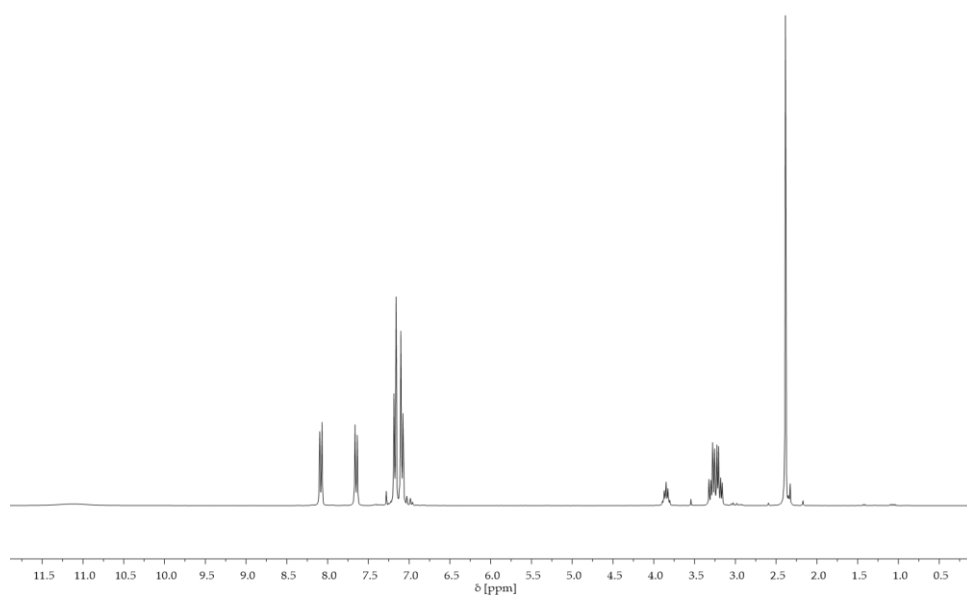

**Figure 1:** <sup>1</sup>H-NMR spectrum of bisthioether 7 in CDCl<sub>3</sub> at 301.2 K and 300 MHz.

### 1.1.2 <sup>13</sup>C liquid NMR spectrum

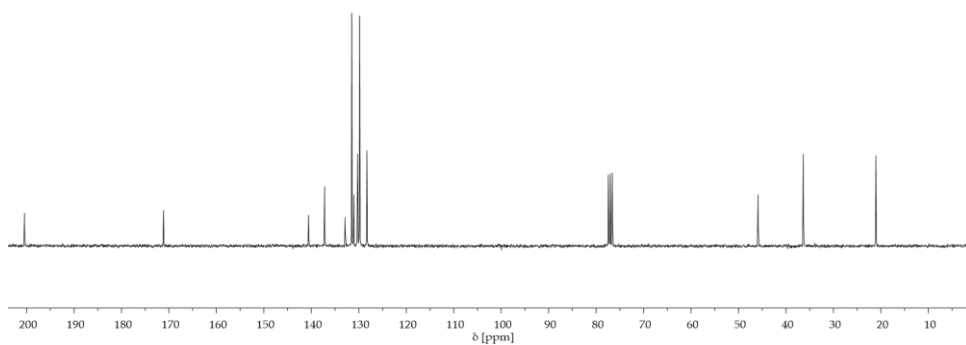

**Figure 2:**  $^{13}\text{C}$ -NMR spectrum of Bisthioether **7** in  $\text{CDCl}_3$  at 301.2 K and 75 MHz.

## 1.2 Bis-sulfone **8**

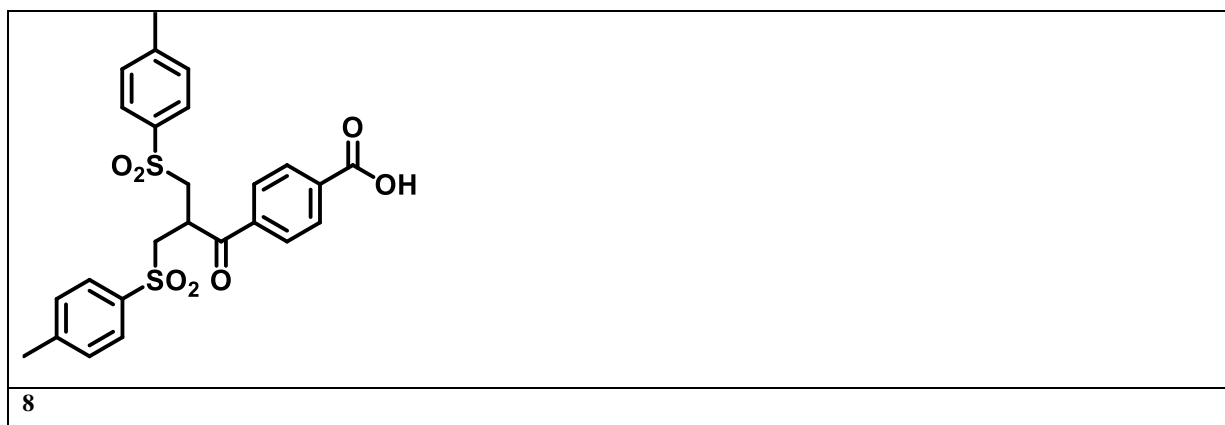

### 1.2.1 $^1\text{H}$ liquid NMR spectrum

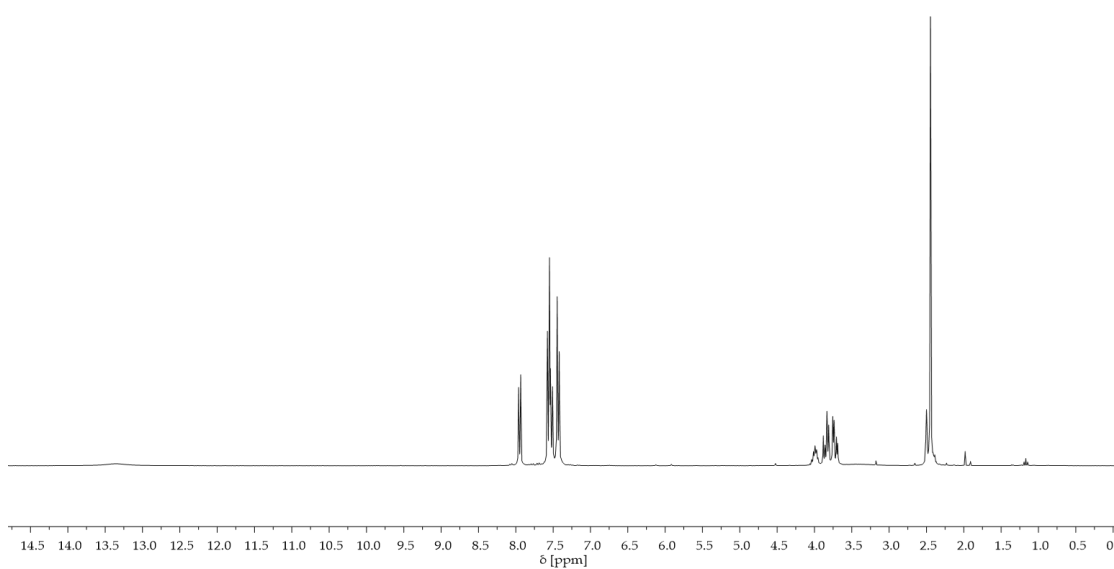

**Figure 3:**  $^1\text{H}$ -NMR spectrum of bis-sulfone **8** in  $\text{DMSO-d}_6$  at 303 K and 300 MHz.

### 1.2.2 <sup>13</sup>C liquid NMR spectrum

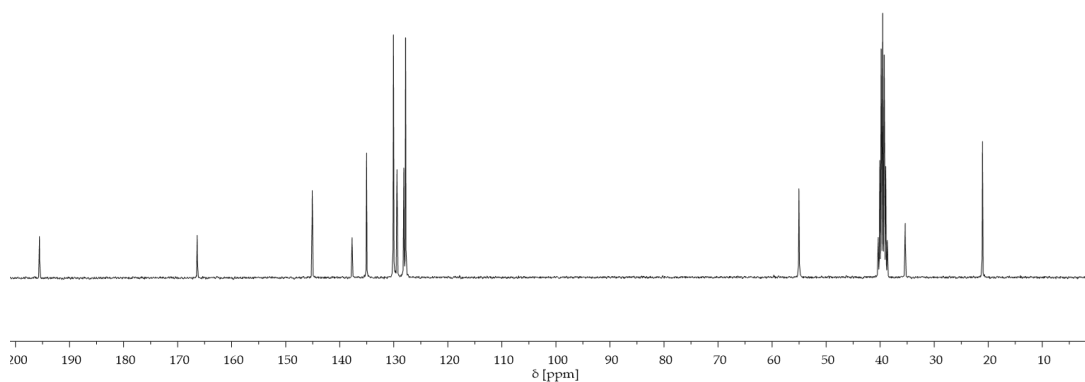

**Figure 4:** <sup>13</sup>C-NMR spectrum of bis-sulfone **8** in DMSO-d<sub>6</sub> at 303 K and 75 MHz.

### 1.3 Bis-sulfone based spin label **4** and **5**

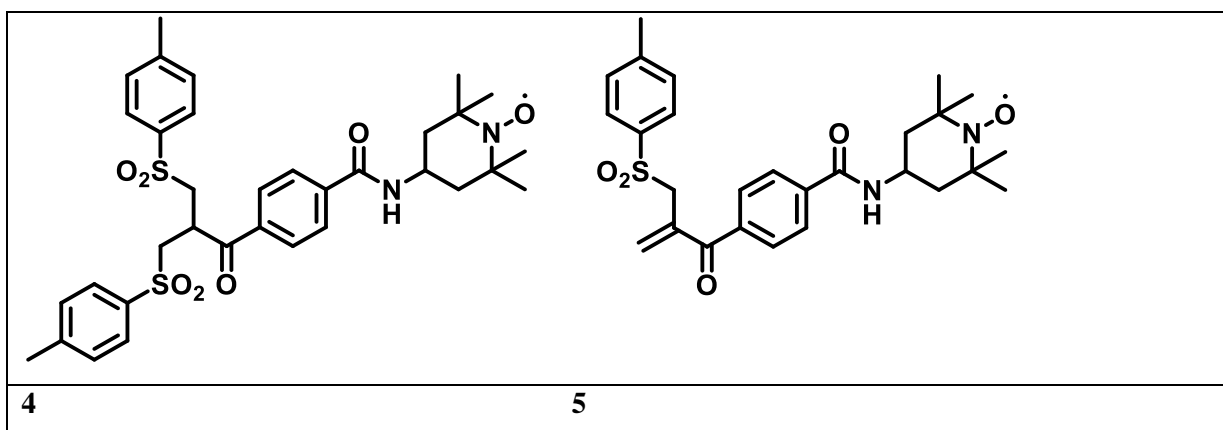

#### 1.3.1 <sup>1</sup>H liquid NMR spectrum

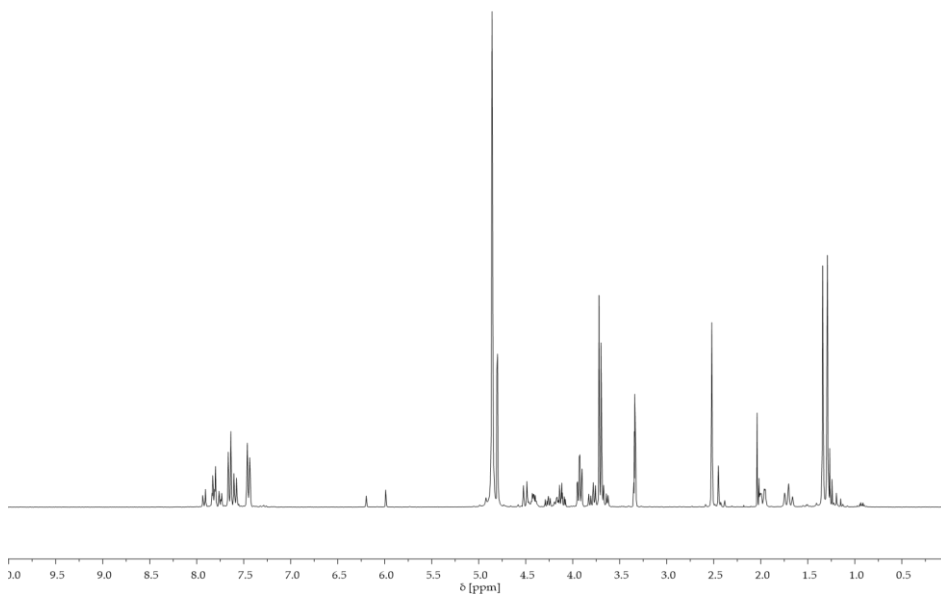

**Figure 5:**  $^1\text{H}$ -NMR spectrum of the mixture of bis-sulfone based spin labels **4** and **5** (after addition of ascorbic acid) in  $\text{MeOH-d}_4$  at 303 K and 300 MHz.

### 1.3.2 $^{13}\text{C}$ liquid NMR spectrum

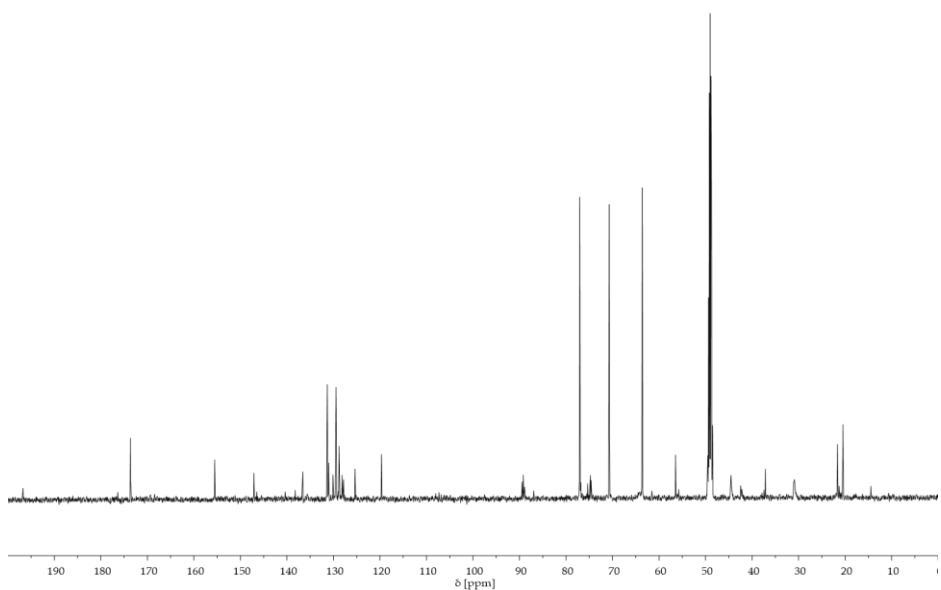

**Figure 6:**  $^{13}\text{C}$ -NMR spectrum of the mixture of bis-sulfone based spin labels **4** and **5** (after addition of ascorbic acid) in  $\text{MeOH-d}_4$  at 303 K and 75 MHz.

### 1.3.3 HPLC chromatogram

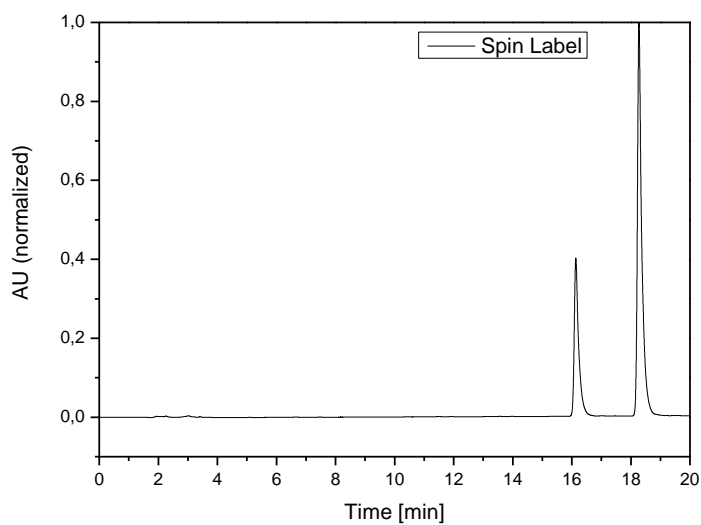

**Figure 7:** HPLC chromatogram of bis-sulfone based spin labels **4** ( $t_R = 18.3$  min.) and **5** ( $t_R = 16.1$  min.) at 214 nm, with gradient of acetonitril in water from 20% to 80% with 0.1% TFA for 20 minutes.

#### 1.3.4 EPR spectrum

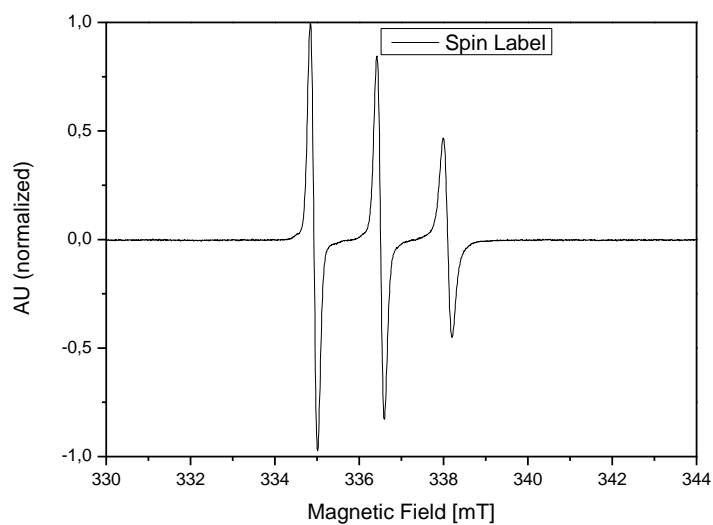

**Figure 8:** ESR spectrum of ca. 15 mM bis-sulfone based spin label **4** and **5** at 20 °C.

#### 1.3.3 HPLC-MS chromatogram

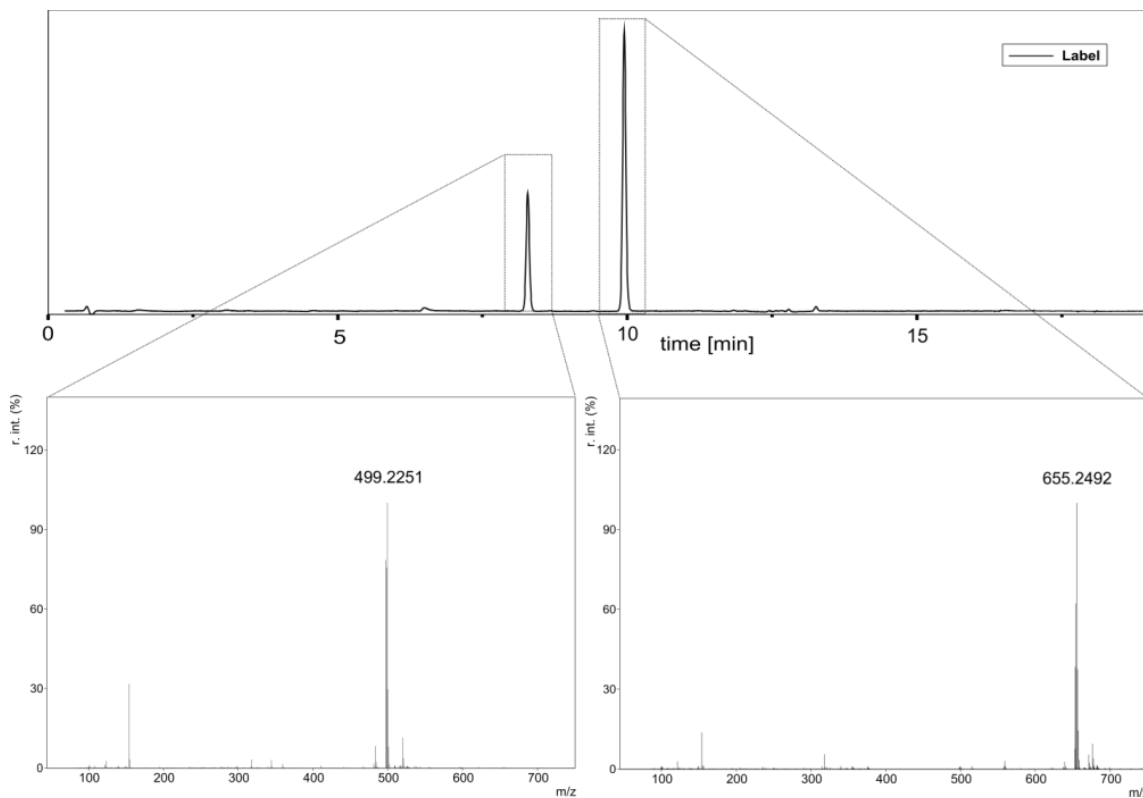

**Figure 9:** HPLC-MS chromatogram of bis-sulfone based spin label **4** and **5** at 180-400 nm, with gradient of acetonitril in water from 20% to 90% with 0.1% formic acid for 19 minutes.

## 2. Synthesis of spin labeled eptifibatide

### 2.1 Reduced eptifibatide **2**

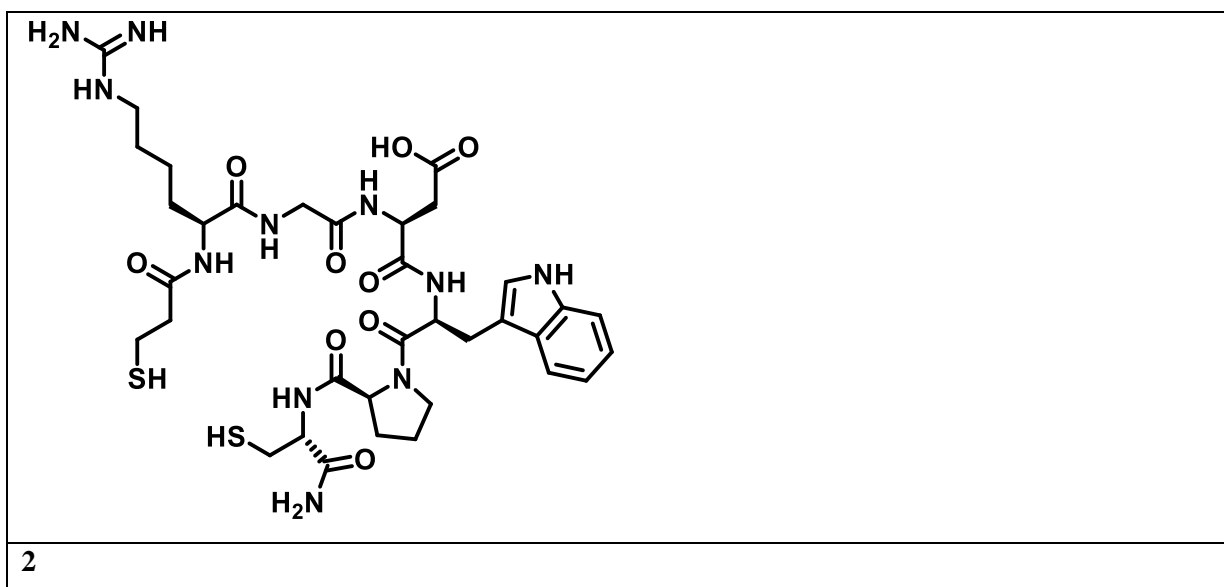



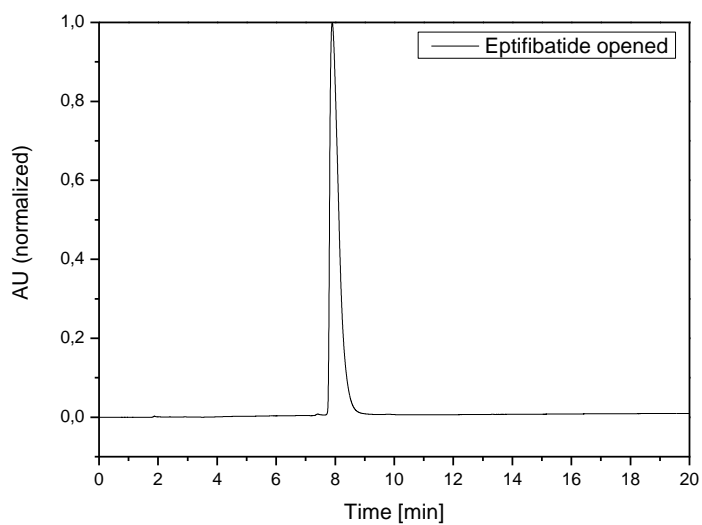

**Figure 10:** HPLC chromatogram of reduced eptifibatide **2** detected at 214 nm, with gradient of acetonitril in water from 20% to 80% with 0.1% TFA for 20 minutes.

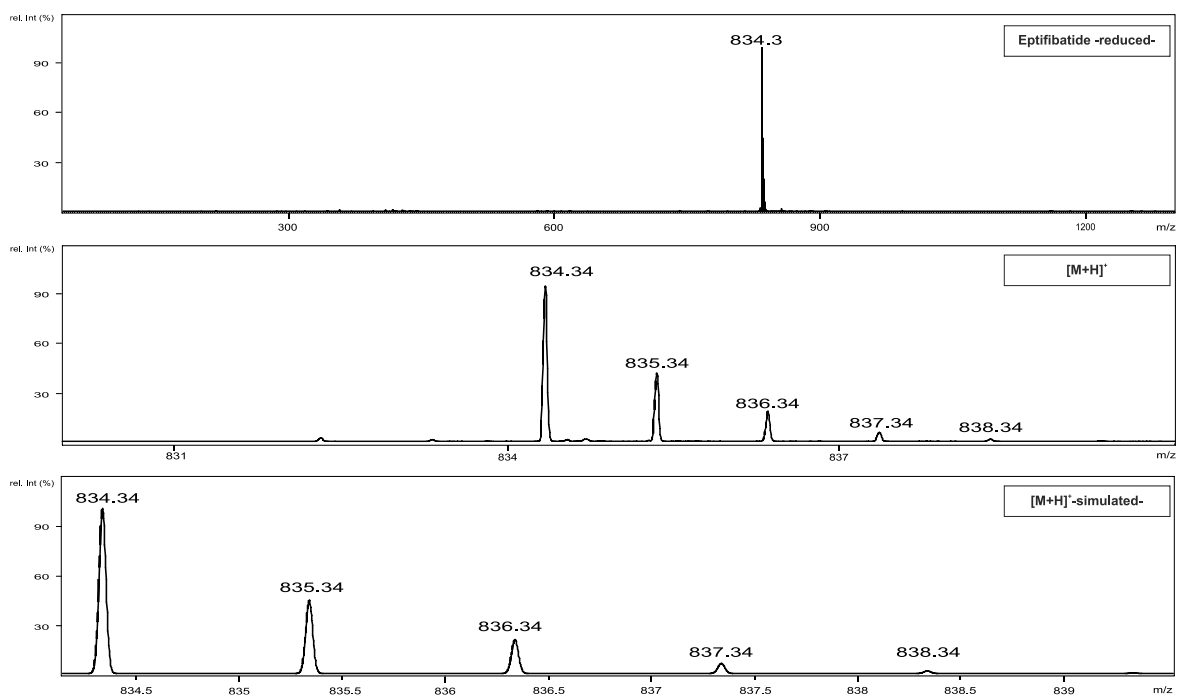

**Figure 11:** ESI-MS spectrum of reduced eptifibatide **2** with zoom into the area of  $[M+1H]^+$  and the simulation for  $[M+1H]^+$ .

## 2.2 Spin labeled eptifibatide 3

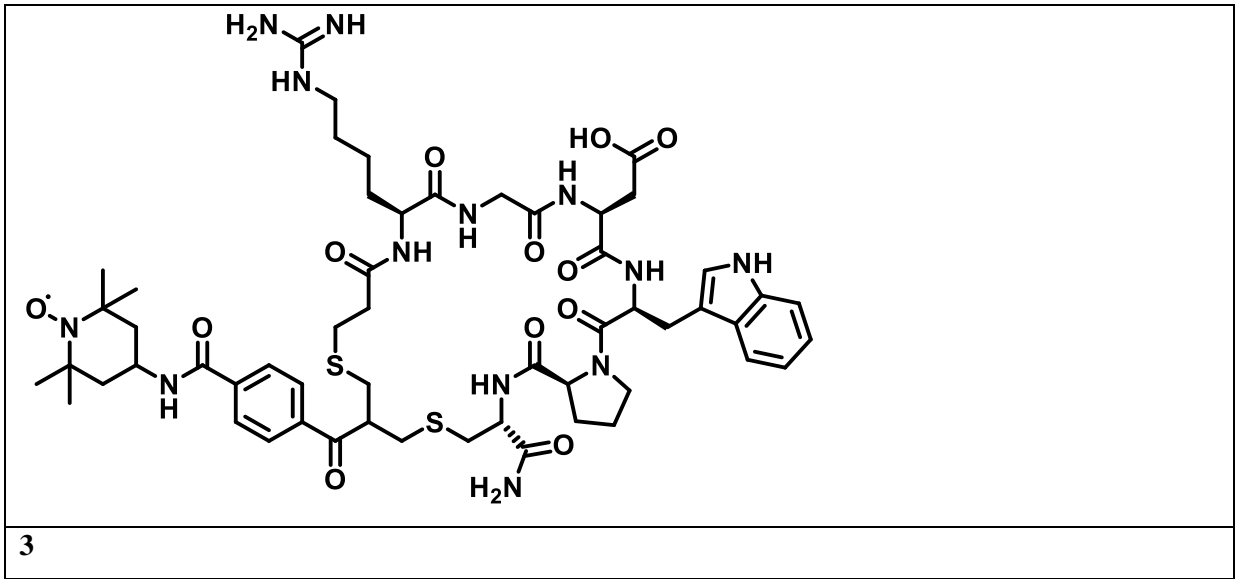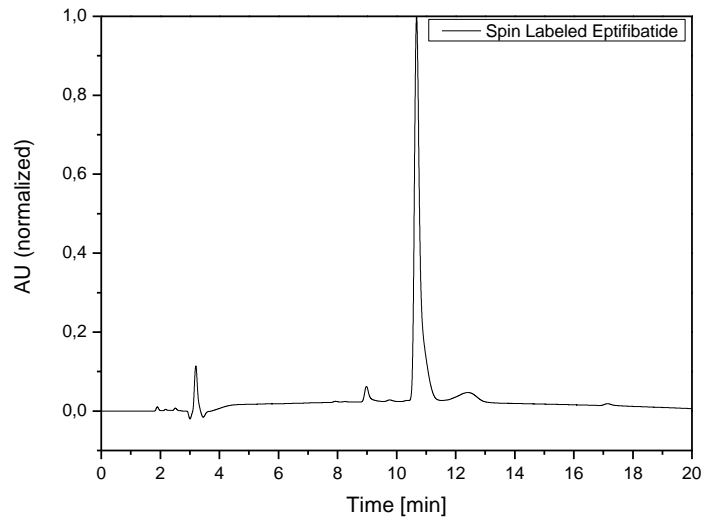

**Figure 12:** HPLC chromatogram of labeled eptifibatide **3** detected at 214 nm, with gradient of acetonitril in water from 20% to 80% with 0.1% TFA for 20 minutes.

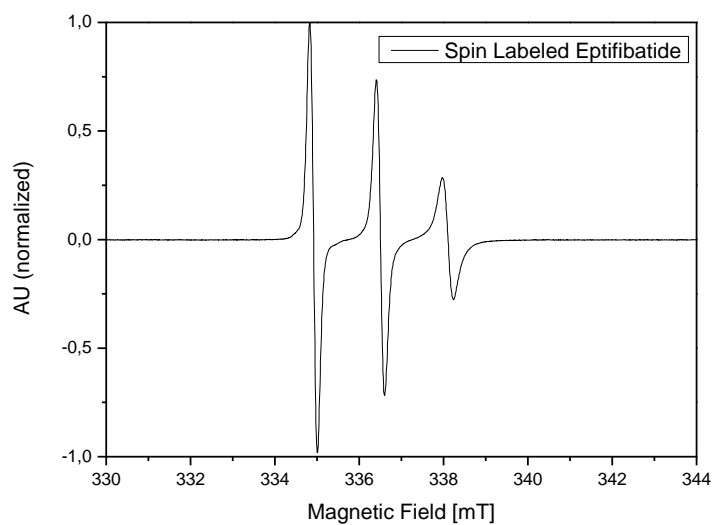

**Figure 13:** ESR spectrum of ca. 15 mM spin labeled eptifibatide **3**.at 20 °C.

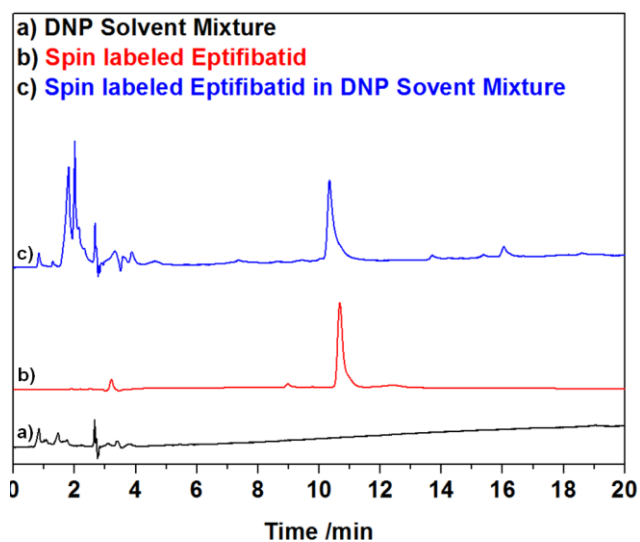

**Figure 14:** HPLC traces (214 nm, with gradient of acetonitril in water from 20% to 80% with 0.1% TFA for 20 minutes) illustrating the DNP solvent mixture (a), spin labeled eptifibatide **3** (b) and spin labeled eptifibatide **3** in DNP solvent mixture (c).
